# Supplementary material for: Competition contributes to both warm and cool range edges
Source: PubMed Central journal article supplement (PMC9076896; doi:10.1038/s41467-022-30013-3), 2022-05-06
Supplement: 41467_2022_30013_MOESM2_ESM.pdf [file 41467_2022_30013_MOESM2_ESM.pdf]

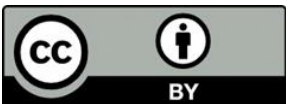

**Open Access** This file is licensed under a Creative Commons Attribution 4.0 International License, which permits use, sharing, adaptation, distribution and reproduction in any medium or format, as long as you give appropriate credit to the original author(s) and the source, provide a link to the Creative Commons license, and indicate if changes were made. In the cases where the authors are anonymous, such as is the case for the reports of anonymous peer reviewers, author attribution should be to 'Anonymous Referee' followed by a clear attribution to the source work. The images or other third party material in this file are included in the article's Creative Commons license, unless indicated otherwise in a credit line to the material. If material is not included in the article's Creative Commons license and your intended use is not permitted by statutory regulation or exceeds the permitted use, you will need to obtain permission directly from the copyright holder. To view a copy of this license, visit <http://creativecommons.org/licenses/by/4.0/>.

## REVIEWER COMMENTS

### Reviewer #1 (Remarks to the Author):

This manuscript uses an ambitious experimental design to test how coexistence mechanisms change across an elevation gradient for species originating from low or high elevation environments. This involves a series of pairwise competition assays, in which a focal species is grown in a background of itself or a single competitor. This basic design is replicated across all possible species pairs and then repeated in three sites of differing elevation. Demographic models were used to project population growth for each species in each treatment and calculate the contributions of niche and fitness differences to coexistence outcomes. The major findings include that (1) most species can invade (i.e., population growth is positive) most sites in the absence of competition; (2) this remains true for lowland species experiencing competition, but most highland species can no longer invade lowland environments in competitive treatments; and (3) species become relatively more sensitive to competition at elevations outside of their elevation range, due to idiosyncratic contributions of changing niche and fitness differences. I found this manuscript extremely easy to read and understand and the results are quite interesting. I have only a few minor queries and comments.

(1) Please better justify why drop only the two highland species from the ANOVA instead of others with similar issues, e.g. *Poa*.

(2) L139-140: Is this entirely attributable to competition, or were these pairs including the species that could not establish on their own?

(3) Weather during experiment was warm relative to historical normals, so high-high pairs were being tested to coexist under atypical (more lowland-like) conditions. L259-60 attributes their difficulty coexisting to soil, but the prior paragraph about climate change seems at least as likely as a mechanism. Please revise the discussion to include this point.

### Reviewer #2 (Remarks to the Author):

This paper asks whether the strength of pairwise competition varies across elevational ranges of alpine species, and tries to identify the mechanism(s) driving differences in competition among and between high- v. low- elevation community members. The authors conduct manipulative experiments of competition to generate estimates of low- & high-density population growth rate, as well as population growth rate when grown with a competitor monoculture, for an impressive array of species spanning a dramatic elevational range. The authors use these results to quantify the strength of competitive effects within v. across species' ranges, as well as to parameterize a statistical method that disentangles the role of niche differences v. relative fitness differences in mediating competition. This manuscript synthesizes an impressive array of field and modelling work, for multiple species, and is novel in that it both quantifies competition outcomes and tries to identify the mechanisms driving competition

outcomes—and how those mechanisms vary geographically. I have a few major points and some minor comments.

Major points:

1. The authors quantify competition between species pairs in monocultures. I understand that these monoculture competition experiments are necessary to parameterize the Carroll et al. approach they use to quantify mechanisms of competition. But these experimental manipulations are quite divorced from how competition actually works in a diverse community. I have a hard time understanding whether the results in Fig 1, which show that the effect of competition (with monocultures) varies systemically with elevation, actually reflect the impact of competition in nature, where species compete not with a monoculture but with diverse communities. This problem seems particularly concerning if there are differences in diversity across elevations (which I imagine there are). The fact only some species pairs that currently co-exist in nature were expected to coexist according to the modelling results reflects this discrepancy.
2. Perhaps the most interesting result in this paper is that niche differences tend to modulate coexistence among sympatric but not parapatric species. However, I found this result somewhat unsatisfying in that the biological mechanism driving this result is not at all clear. While the authors do identify one mechanism that might be driving this effect (phenology), it is not clear to me from their explanation whether such a mechanism might be universal or not, particularly since they provide no biological/ physiological explanation for why phenology overlaps more outside of a species' range rather than within the range.
3. Somewhat related to no. 2, I think the explanation of the Carroll et al. approach needs quite a bit more explanation earlier in the paper, ideally with a biological example to illustrate what these values actually reflect—perhaps even with a conceptual figure of some kind. It is difficult to intuit what the ND v. RFD values actually mean biologically, even after carefully reading the methods a number of times and looking at the Carroll paper. I think this problem is exacerbated by the switching back and forth between “niche difference” v. “niche overlap” in the text.

Minor comments:

Line 14-15: I found this sentence much too vague. I suggest inserting “the importance of” after “how”. I also found “processes” too vague.

Line 48: change “species interactions” to “competition”, as this paper is only focusing on competition, not on all species interactions

Line 124: Missing “growth rates” after ‘intrinsic population.’

The fact that lowland species are predicted to occur at the highland site (but currently do not) is troubling. It is unclear if this phenomenon arises from disconnect between modelling results and reality, or whether it is actually due to disequilibrium between current climate and the species' distributions.

The authors' claim that it is the latter would be strengthened by some evidence of dispersal limitation.

What is the AIC (or AICc?) weight of the top models?

It appears that the issue of size eviction from the IPMs was assessed visually somehow? I'm not sure how you would do this—a more methodological approach (i.e., testing for any eviction) would be more appropriate.

I do not understand the rationale behind randomly selecting 56 IPMs in the supplemental information. More clarification is needed.

In the methods the authors indicate that the monoculture gardens weren't fully established until autumn 2017, but then they use data from the 2017-2018 transition to parameterize their IPMs—so this transition began before the monocultures were fully established and should be excluded.

Reviewer #3 (Remarks to the Author):

This paper combines field experiments with model simulations to look at species range limits using modern coexistence theory. I like the design of this study that directly tests the effects of intra- and interspecific competition and abiotic factors on species coexistence along the elevation. I am impressed by the detailed fieldwork conducted by the authors. However, I have a few suggestions regarding the authors' analysis and presentation of results.

1. As the authors correctly understand, the resident populations of competing species must be at equilibrium when conducting invasion analyses. That is, the population growth rate of the competing species in interspecific competition treatment should be close to zero. However, I did not see the authors address this issue. From Figure S5, it appears that the population growth rates of intra-specific competition treatment are much greater or less than zero in many species. This means that populations are either declining or increasing. Is this also true for resident species in the inter-specific competition treatment? Furthermore, although it is reasonable that the population growth rate for the intra-specific competition is lower than that for interspecific competition (because intra-species competition is higher than the interspecies competition), the population growth of focal species is usually very high, much higher than that of intra-species competition treatment, as shown in Figure S5. This part is very strange to me, do the authors have any explanation? This also leads me to ask whether the competing populations have not reached equilibrium. I hope this part can be discussed more clearly because it is a key assumption of the modern coexistence theory.

2. This also makes me want to see more original data points in the authors' results. The authors provide the formula used to estimate each fitness component in Table S5, as well as the AIC values for the model described in the subsequent table. However, in the absence of comparisons, the AIC values do not provide much information. Therefore, I would like to see direct plots with actual data points of the relationship between the data points and the regressions. I would also like to see the regression plots with and without outliers (authors said they remove less than 1% of the data points) and the effect of these outliers on the results.

3. More formally, as the authors cite in Ellner's (2016) book on IPM estimation (p. 30), Ellner suggests that "Always quantify your uncertainty!", I would like to see the authors estimate the uncertainty of the results and then separate the conclusions for species with higher uncertainty from those with higher statistical power.

4. I read the author's description of the experimental methods many times before I understood how the authors' setups of the intra- and interspecific competition treatment. I suggest that the authors could draw a diagram so that readers can understand how intraspecific competition is created and how the

positions of the resident and invasive populations are arranged in the interspecific competition treatments.

Reviewer #4 (Remarks to the Author):

It was a delight to read this manuscript that uses decent macroecological experiments to examine how biotic interactions shape species distribution boundaries. Such studies are relatively rare, but they are crucial in clarifying the role of complex species interactions. Particularly, the authors applied coexistence theory to understand the processes of competition underlying boundary formation. I had many questions at the beginning of reading this manuscript, but most of these were resolved as I continued. Overall, this is an important study with rigorous experiments, and the manuscript is well-structured. I have a few comments for the authors.

Please forgive me for being a bit picky about the concluding sentences in the abstract. "Taken together, these results challenge the view that competition has a diminished role in structuring communities in abiotically stressful environments." This sentence insinuates a comparison between competition and climate factors, but testing their relative importance was outside the main focus of this study. The experiments were more about 'how' competition processes affected distribution across environmental gradients. The setting of experiments and analytical strategy will inevitably underestimate the effects of abiotic factors, including the use of the same soil substrate, the short time frame for parameter collection, which does not truly reflect how environmental fluctuation affects population growth, and largely focused on niche difference versus fitness differences. In any case, environmental effects are inferential and relative contributions to competition are difficult to present. The authors are well aware of these limitations in the discussion. I suggest that the abstract could be modified to explicitly reflect the focus of the study.

I also suggest that the Introduction paragraph can be presented in a hypothesis-prediction format. The application of coexistence theory in biogeographic studies at a large scale and range limits is still in its infancy (e.g. Alexander et al. 2018 TREE). Its novelty and importance are noted, but not necessary to readers outside the field. The authors could provide more context to smoothly bridge these fields. Particularly in the context of environmental gradients, the so-called harsh or benign climate, what are the expected consequences for niche difference and relative fitness, based on known hypotheses.

The population models are essential to derive the coexistence metrics, niche differences, and relative fitness differences. However, because the parameters were obtained at a short time period, which does not reflect how environmental fluctuation affects species coexistence, the metrics may be systematically biased, probably leading to the underestimation of species coexistence at high altitudes. This may be beyond the scope of this study, but the authors can discuss the possible effects.

The results showed that neither competition nor climate limits lowland species, and their current distribution reflect disequilibrium with climates. The argument will then suggest that the current experimental setting may be somewhat biased and the results can be misleading to a certain extent.

The authors use a community perspective to analyze how the upper and lower boundaries of species are affected by competition, but the comparisons are between the upper boundaries of lowland species and the lower boundaries of highland species, which are all adjacent to other species, not at the harsh boundary of the target gradient, and not comparing the upper and lower boundaries of specific species. As the stress gradient hypothesis can be largely from a species perspective, discussing the relative pressure at their upper and lower boundaries, it is suggested that the authors clarify the differences.

1 **Author responses**

2 Reviewer #1 (Remarks to the Author):

3

4 This manuscript uses an ambitious experimental design to test how coexistence  
5 mechanisms change across an elevation gradient for species originating from low or  
6 high elevation environments. This involves a series of pairwise competition assays,  
7 in which a focal species is grown in a background of itself or a single competitor.

8 This basic design is replicated across all possible species pairs and then repeated in  
9 three sites of differing elevation. Demographic models were used to project  
10 population growth for each species in each treatment and calculate the contributions  
11 of niche and fitness differences to coexistence outcomes. The major findings include  
12 that (1) most species can invade (i.e., population growth is positive) most sites in the  
13 absence of competition; (2) this remains true for lowland species experiencing  
14 competition, but most highland species can no longer invade lowland environments  
15 in competitive treatments; and (3) species become relatively more sensitive to  
16 competition at elevations outside of their elevation range, due to idiosyncratic  
17 contributions of changing niche and fitness differences. I found this manuscript  
18 extremely easy to read and understand and the results are quite interesting. I have  
19 only a few minor queries and comments.

20

21 Thank you for your suggestions on the analysis and phrasing that helped us to  
22 reduce possible confusion and refine the discussion. We are delighted that the  
23 reviewer found our manuscript easy to understand and interesting.

24

25 (1) Please better justify why drop only the two highland species from the ANOVA  
26 instead of others with similar issues, e.g. *Poa*.

27

28 We no longer exclude these species in our revision since the sensitivity of this result  
29 can now be fully evaluated using the bootstrapping procedure that we implemented  
30 in response to the comments of reviewer 3.

31

32 (2) L139-140: Is this entirely attributable to competition, or were these pairs including  
33 the species that could not establish on their own?

34

35 The species that failed to establish as background species were predicted not to  
36 persist in the absence of competition by our models, suggesting the failure to  
37 establish may not be due to competition but due to the abiotic environment, such as  
38 drought at the lowest site. We have added this information to the revised manuscript  
39 (lines 364 - 367) and excluded the original statement that appeared unclear and no  
40 longer relevant since we updated the result on competition outcomes (Fig. 2a-c).

41

42 (3) Weather during experiment was warm relative to historical normals, so high-high  
43 pairs were being tested to coexist under atypical (more lowland-like) conditions.  
44 L259-60 attributes their difficulty coexisting to soil, but the prior paragraph about  
45 climate change seems at least as likely as a mechanism. Please revise the  
46 discussion to include this point.

47

48 This is a good point. We have included it in the revised discussion (lines 287-290).

49

50 Reviewer #2 (Remarks to the Author):

51

52 This paper asks whether the strength of pairwise competition varies across  
53 elevational ranges of alpine species, and tries to identify the mechanism(s) driving  
54 differences in competition among and between high- v. low- elevation community  
55 members. The authors conduct manipulative experiments of competition to generate  
56 estimates of low- & high-density population growth rate, as well as population growth  
57 rate when grown with a competitor monoculture, for an impressive array of species  
58 spanning a dramatic elevational range. The authors use these results to quantify the  
59 strength of competitive effects within v. across species' ranges, as well as to  
60 parameterize a statistical method that disentangles the role of niche differences v.  
61 relative fitness differences in mediating competition. This manuscript synthesizes an  
62 impressive array of field and modelling work, for multiple species, and is novel in that  
63 it both quantifies competition outcomes and tries to identify the mechanisms driving  
64 competition outcomes—and how those mechanisms vary geographically. I have a  
65 few major points and some minor comments.

66

67 Thank you. We are pleased that the reviewer considers our work to be interesting  
68 and novel.

69

70 Major points:

71 1. The authors quantify competition between species pairs in monocultures. I  
72 understand that these monoculture competition experiments are necessary to  
73 parameterize the Carroll et al. approach they use to quantify mechanisms of  
74 competition. But these experimental manipulations are quite divorced from how  
75 competition actually works in a diverse community. I have a hard time understanding  
76 whether the results in Fig 1, which show that the effect of competition (with  
77 monocultures) varies systemically with elevation, actually reflect the impact of  
78 competition in nature, where species compete not with a monoculture but with  
79 diverse communities. This problem seems particularly concerning if there are  
80 differences in diversity across elevations (which I imagine there are). The fact only  
81 some species pairs that currently co-exist in nature were expected to coexist  
82 according to the modelling results reflects this discrepancy.

83

84 We agree with the reviewer that effects of competition in natural multispecies  
85 systems might be more complex, for example because of interaction chains and  
86 “high-order” interactions (e.g., Levine et al. 2017) and differences in the diversity as  
87 well as the identity of species across environmental gradients. This complexity is part  
88 of the reason why we believe it has been difficult to clearly interpret how competition  
89 contributes to setting range limits across environmental gradients when these factors  
90 (diversity and identity) are not controlled, as they are in our experiment. We  
91 acknowledge that focusing on pairwise competition is a simplification, but our  
92 experimental design allows us to separate out effects of competitor identity from  
93 changing intensity of interactions among particular species, and furthermore to gain  
94 insight into how changing competition intensity is mediated by niche and fitness  
95 differences between species. This insight would be much more difficult to obtain from  
96 investigations within multispecies communities. We acknowledge that the net effect  
97 of all interactions in natural systems might lead to quantitatively different conclusions  
98 about where the range limits of our study species are set in nature, and have added  
99 this caveat to the revised Discussion (lines 204-206 and 274-277). We also make  
100 suggestions for future work to examine how complex interaction networks can



101 contribute to setting range limits (lines 317-320). Please also see our response to the  
102 comment of reviewer 3 and 4 below regarding predictions of coexistence among  
103 cooccurring species.

104

105 2. Perhaps the most interesting result in this paper is that niche differences tend to  
106 modulate coexistence among sympatric but not parapatric species. However, I found  
107 this result somewhat unsatisfying in that the biological mechanism driving this result  
108 is not at all clear. While the authors do identify one mechanism that might be driving  
109 this effect (phenology), it is not clear to me from their explanation whether such a  
110 mechanism might be universal or not, particularly since they provide no biological/  
111 physiological explanation for why phenology overlaps more outside of a species'  
112 range rather than within the range.

113

114 We agree with the reviewer that the quantities of niche differences per se tell us little  
115 about biological mechanisms. Their phenomenological nature is, in fact, a strength,  
116 because they allow us to detect the operation of niche processes without a priori  
117 hypotheses about the precise biological mechanisms, for which specific and targeted  
118 experiments (e.g., manipulating nutrient concentrations, natural enemy pressure,  
119 etc.) are needed. This is outside of the scope of the current paper, but we have  
120 added this point to the future perspectives in the revised manuscript (lines 311-317).

121

122 Phenology has been shown to be a key trait modulating niche differences and  
123 species coexistence in other systems (e.g., Usinowicz et al. 2017), but we, of course,  
124 cannot conclude from our study about whether species in general have smaller  
125 phenological overlap within versus beyond their range. We have explicitly included  
126 this point in the revised manuscript (lines 223-228). In sum, we agree with the  
127 reviewer that it would be satisfying to understand the mechanisms explaining  
128 changes in niche overlap in further detail, but to do so requires a different set of  
129 experiments that are beyond the phenomenological framework we adopt in the  
130 current study.

131

132 3. Somewhat related to no. 2, I think the explanation of the Carroll et al. approach  
133 needs quite a bit more explanation earlier in the paper, ideally with a biological  
134 example to illustrate what these values actually reflect—perhaps even with a  
135 conceptual figure of some kind. It is difficult to intuit what the ND v. RFD values  
136 actually mean biologically, even after carefully reading the methods a number of  
137 times and looking at the Carroll paper. I think this problem is exacerbated by the  
138 switching back and forth between “niche difference” v. “niche overlap” in the text.

139

140 We thank the reviewer for pointing this out. We agree with the reviewer that the ND  
141 and RFD concepts are abstract since they are only phenomenological syntheses of  
142 biological mechanisms underlying species coexistence. To facilitate the intuitive  
143 understanding of ND and RFD, we have fleshed out the concepts of ND and RFD in  
144 the Introduction and accompanied them with specific biological examples (lines 59-  
145 64), explicitly linked them with range limits (lines 65-67 and 73-76) in the Introduction  
146 and linked the concepts with their calculations in the Methods (lines 447-455). We  
147 have updated our terminology, using “niche differences” consistently wherever  
148 possible to avoid confusion.

149

150 Minor comments:

151 Line 14-15: I found this sentence much too vague. I suggest inserting “the  
152 importance of” after “how”. I also found “processes” too vague.

153  
154 We have rephrased this sentence.

155  
156 Line 48: change “species interactions”  
157 to “competition”, as this paper is only focusing on competition, not on all species  
158 interactions

159  
160 We have updated using competition wherever suitable throughout the manuscript.

161  
162 Line 124: Missing “growth rates” after ‘intrinsic population.’

163  
164 We have rephrased this.

165  
166 The fact that lowland species are predicted to occur at the highland site (but  
167 currently do not) is troubling. It is unclear if this phenomenon arises from disconnect  
168 between modelling results and reality, or whether it is actually due to disequilibrium  
169 between current climate and the species’ distributions. The authors’ claim that it is  
170 the latter would be strengthened by some evidence of dispersal limitation.

171  
172 This is a good point. We have now explicitly discussed the possible roles of dispersal  
173 limitation in giving rise to disequilibrium in lowland species’ distribution and added  
174 relevant references (lines 264-266). This comment also made us think about other  
175 possible reasons why some lowland plants might have performed better than  
176 expected at high elevation in our experiment. One possibility is that while average  
177 climatic conditions at high elevation (captured by our experiment) might be  
178 permissive for these species, climate extremes might not. Extreme events (such as  
179 late frosts) might contribute to upper range limits of lowland species but occur  
180 infrequently, and so be missed by short-term experiments. We now include a  
181 discussion of this possibility in our revision (lines 256-258).

182  
183 What is the AIC (or AICc?) weight of the top models?

184  
185 We used AICc and added the AICc weight in Supplementary Table 6 and another  
186 table including the complete comparison of all candidate models in Supplementary  
187 Data 1.

188  
189 It appears that the issue of size eviction from the IPMs was assessed visually  
190 somehow? I’m not sure how you would do this—a more methodological approach  
191 (i.e., testing for any eviction) would be more appropriate.

192  
193 Thank you for this suggestion. In the revised manuscript we now follow the method  
194 suggested by Ellner et al. 2016 (pages 45-48) to detect the size eviction, and report  
195 the results of this analysis in the revised Supplementary Methods that shows the size  
196 eviction occurs with only a small probability (Supplementary Information lines 85-87).

197  
198 I do not understand the rationale behind randomly selecting 56 IPMs in the  
199 supplemental information. More clarification is needed.

200

201 We are sorry that the original statement was not clear. We integrated IPMs using  
202 mid-point rules in which the mesh points (size range divided by the number of bins)  
203 should be small enough to include all possible sizes of offspring. In other words, the  
204 more bins the IPMs have, the more accurate the projected population growth is, but  
205 the longer it takes to compute. To find the minimum number of bins on which  
206 population growth rates converge, we projected the IPMs starting with 100 bins and  
207 increased it until the projected population growth rates stabilized, an approach  
208 suggested by Ellner et al. (pages 48-49) . We have fleshed out this procedure in the  
209 Supplementary Methods (lines 87-89) and excluded the original figure including the  
210 56 IPMs that we don't believe is necessary to include in the revised manuscript.

211  
212 In the methods the authors indicate that the monoculture gardens weren't fully  
213 established until autumn 2017, but then they use data from the 2017-2018 transition  
214 to parameterize their IPMs—so this transition began before the monocultures were  
215 fully established and should be excluded.

216  
217 The reviewer is correct that not all monocultures were fully established in autumn  
218 2017. To ensure that focal plants only compete against established monocultures,  
219 we did not transplant any plants into those plots in autumn 2017. Therefore, the data  
220 included in the analysis between 2017 and 2018 were measured only on focal plants  
221 that competed against established monocultures. We realized the original statement  
222 was unclear and clarified this statement in the revised Methods (lines 375-376).

223  
224 Reviewer #3 (Remarks to the Author):

225  
226 This paper combines field experiments with model simulations to look at species  
227 range limits using modern coexistence theory. I like the design of this study that  
228 directly tests the effects of intra- and interspecific competition and abiotic factors on  
229 species coexistence along the elevation. I am impressed by the detailed fieldwork  
230 conducted by the authors.

231  
232 Thank you for your suggestions, particularly those on the modelling and analysis.

233  
234 However, I have a few suggestions regarding the authors' analysis and presentation  
235 of results.1. As the authors correctly understand, the resident populations of  
236 competing species must be at equilibrium when conducting invasion analyses. That  
237 is, the population growth rate of the competing species in interspecific competition  
238 treatment should be close to zero. However, I did not see the authors address this  
239 issue. From Figure S5, it appears that the population growth rates of intra-specific  
240 competition treatment are much greater or less than zero in many species. This  
241 means that populations are either declining or increasing. Is this also true for  
242 resident species in the inter-specific competition treatment? Furthermore, although it  
243 is reasonable that the population growth rate for the intra-specific competition is  
244 lower than that for interspecific competition (because intra-species competition is  
245 higher than the interspecies competition), the population growth of focal species is  
246 usually very high, much higher than that of intra-species competition treatment, as  
247 shown in Figure S5. This part is very strange to me, do the authors have any  
248 explanation? This also leads me to ask whether the competing populations have not  
249 reached equilibrium. I hope this part can be discussed more clearly because it is a  
250 key assumption of the modern coexistence theory.

251  
252  
253  
254  
255  
256  
257  
258  
259  
260  
261  
262  
263  
264  
265  
266  
267  
268  
269  
270  
271  
272  
273  
274  
275  
276  
277  
278  
279  
280  
281  
282  
283  
284  
285  
286  
287  
288  
289  
290  
291  
292  
293  
294  
295  
296  
297  
298  
299  
300

There are two issues here. Firstly, the reviewer correctly says that the “the resident populations of competing species must be at equilibrium when conducting invasion analyses”. That is, the monoculture plots should represent a population near its single-species carrying capacity, into which focal species are invading. We address this point in the next paragraph, below. Secondly, the reviewer says “the population growth rate of the competing species in interspecific competition treatment should be close to zero”, and is surprised that the growth rates for interspecific competition is often much higher than that of intraspecific competition. We believe this is a misunderstanding – in our experiment we measure *invasion* or *low-density* growth rates, that is, the population growth rate when the focal species is experiencing no conspecific density dependence (see lines 405-410). If interspecific competition is very weak (e.g., niche differences are very large), then invasion growth rates could be similar to intrinsic growth rates (that is, growth rates in absence of any competition). Therefore, we do not assume that interspecific competition has reached equilibrium, rather the opposite. We have included a diagram to clarify the design of our field experiment in Supplementary Fig. 1.

We further explored our data to address the reviewer’s question about whether our monoculture plots could be considered to be close to equilibrium. In the revised manuscript, we determined the uncertainty around our estimates of population growth rates using parametric bootstraps as suggested by the reviewer below. We took advantage of these bootstraps to explore whether the background monocultures were at equilibrium. Specifically, the 95% confidence interval of 32% (11 of 34) of intraspecific invasion growth rates (y-axis, log-transformed) included zero, indicating that these monocultures did not significantly depart from equilibrium (Supplementary Fig. 5). For the remaining monocultures that were predicted to depart from equilibrium, ten were predicted to be above equilibrium abundance ( $\ln(\text{intraspecific invasion growth rates}) < 0$ ) and 13 below equilibrium abundance ( $\ln(\text{intraspecific invasion growth rates}) > 0$ ); these case were evenly distributed across the sites (Supplementary Fig. 5), and therefore will not have biased our findings. We are grateful to the reviewer for raising this important point, and now discuss these considerations in the revised Discussion (lines 290 - 295).

2. This also makes me want to see more original data points in the authors' results. The authors provide the formula used to estimate each fitness component in Table S5, as well as the AIC values for the model described in the subsequent table. However, in the absence of comparisons, the AIC values do not provide much information. Therefore, I would like to see direct plots with actual data points of the relationship between the data points and the regressions. I would also like to see the regression plots with and without outliers (authors said they remove less than 1% of the data points) and the effect of these outliers on the results.

The original statement in the Reporting Summary was not clear. We excluded outliers when we fit the regression models that were used to estimate plant size and fecundity (see Data exclusion in updated Reporting Summary), only if obvious errors were identified (e.g., biologically unrealistic size or stalk height). We included already a figure to show the estimated plant sizes against the actual sizes in Supplementary Fig. 3, which allows readers to assess the performance of size regression models.

301 As requested, we have now included an additional figure to show the fitted vital rates  
302 implemented in the models against the raw data in Supplementary Fig. 4. In addition,  
303 we have added a complete comparison of all candidate models and the AICc weight,  
304 as suggested by reviewer 2, in Supplementary Data 1 and Supplementary Table 6.

305

306 3. More formally, as the authors cite in Ellner's (2016) book on IPM estimation (p.  
307 30), Ellner suggests that "Always quantify your uncertainty!", I would like to see the  
308 authors estimate the uncertainty of the results and then separate the conclusions for  
309 species with higher uncertainty from those with higher statistical power.

310

311 Thank you for this suggestion. In the revised manuscript, we performed parametric  
312 bootstraps on size-dependent vital rates (i.e., survival, growth, flowering, and  
313 fecundity) to account for uncertainty in our results. We resampled the parameters of  
314 each vital rate 500 times from multivariate normal distributions using their means and  
315 covariance matrices (lines 427-432). To account for the uncertainty around the  
316 estimates of population growth rates, and to account for error propagation through  
317 subsequent, we fitted all IPMs, calculated  $\lambda$  and quantified competitive outcomes and  
318 coexistence metrics using the 500 bootstrap replicates (lines 471-472). Instead of  
319 separating the conclusion for species with high vs low uncertainty (the separation  
320 criteria would be arbitrary), we performed individual tests for each bootstrap replicate  
321 and determined the significance of effects based on whether the 95% confidence  
322 interval of a given effect included zero (lines 499-504). We have updated the Results  
323 section with the bootstrapped results and included uncertainty estimates in all figures  
324 in the revised manuscript (see Results and figures). Our original conclusions remain  
325 after accounting for uncertainty in estimates of population growth rates.

326

327 4. I read the author's description of the experimental methods many times before I  
328 understood how the authors' setups of the intra- and interspecific competition  
329 treatment. I suggest that the authors could draw a diagram so that readers can  
330 understand how intraspecific competition is created and how the positions of the  
331 resident and invasive populations are arranged in the interspecific competition  
332 treatments.

333

334 Thank you for the suggestion. We have added a diagram of the field experiment  
335 design in Supplementary Fig. 1.

336

337 Reviewer #4 (Remarks to the Author):

338

339 It was a delight to read this manuscript that uses decent macroecological  
340 experiments to examine how biotic interactions shape species distribution  
341 boundaries. Such studies are relatively rare, but they are crucial in clarifying the role  
342 of complex species interactions. Particularly, the authors applied coexistence theory  
343 to understand the processes of competition underlying boundary formation. I had  
344 many questions at the beginning of reading this manuscript, but most of these were  
345 resolved as I continued. Overall, this is an important study with rigorous experiments,  
346 and the manuscript is well-structured.

347

348 Thank you. We are delighted that the reviewer considers our work important and  
349 rigorously conducted.

350



351 I have a few comments for the authors. Please forgive me for being a bit picky about  
352 the concluding sentences in the abstract. “Taken together, these results challenge  
353 the view that competition has a diminished role in structuring communities in  
354 abiotically stressful environments.” This sentence insinuates a comparison between  
355 competition and climate factors, but testing their relative importance was outside the  
356 main focus of this study. The experiments were more about 'how' competition  
357 processes affected distribution across environmental gradients. The setting of  
358 experiments and analytical strategy will inevitably underestimate the effects of abiotic  
359 factors, including the use of the same soil substrate, the short time frame for  
360 parameter collection, which does not truly reflect how environmental fluctuation  
361 affects population growth, and largely focused on niche difference versus fitness  
362 differences. In any case, environmental effects are inferential and relative  
363 contributions to competition are difficult to present. The authors are well aware of  
364 these limitations in the discussion. I suggest that the abstract could be modified to  
365 explicitly reflect the focus of the study.

366

367 This is a good point. We agree with the reviewer that our original narrative, including  
368 “abiotically stressful environments”, might have distracted readers from our focus on  
369 the role of competition in shaping species distributions. We have reframed the  
370 abstract to focus on competition. We have also rephrased the sentence mentioned  
371 by the reviewer (lines 296-299), although we maintain that our results do implicate  
372 competition as an important factor affecting range limits at high elevation.

373

374 I also suggest that the Introduction paragraph can be presented in a hypothesis-  
375 prediction format. The application of coexistence theory in biogeographic studies at a  
376 large scale and range limits is still in its infancy (e.g. Alexander et al. 2018 TREE). Its  
377 novelty and importance are noted, but not necessary to readers outside the field.  
378 The authors could provide more context to smoothly bridge these fields. Particularly  
379 in the context of environmental gradients, the so-called harsh or benign climate, what  
380 are the expected consequences for niche difference and relative fitness, based on  
381 known hypotheses.

382

383 We thank the reviewer for the suggestion. In the revised Introduction we have now  
384 elaborated on the concepts of niche and fitness differences, providing predictions  
385 and examples for how these might change across an elevation gradient (lines 59-64)  
386 and emphasized the novelty of the link between coexistence theory and species'  
387 range limits more explicitly (lines 65-69 and 73-76).

388

389 The population models are essential to derive the coexistence metrics, niche  
390 differences, and relative fitness differences. However, because the parameters were  
391 obtained at a short time period, which does not reflect how environmental fluctuation  
392 affects species coexistence, the metrics may be systematically biased, probably  
393 leading to the underestimation of species coexistence at high altitudes. This may be  
394 beyond the scope of this study, but the authors can discuss the possible effects.

395

396 Thank you for this suggestion. We have explicitly discussed these limitations of our  
397 study in the revised manuscript (lines 256-258 and 279-290).

398

399 The results showed that neither competition nor climate limits lowland species, and  
400 their current distribution reflect disequilibrium with climates. The argument will then

401 suggest that the current experimental setting may be somewhat biased and the  
402 results can be misleading to a certain extent.

403  
404 We take the reviewer's point but don't believe that our results would be biased, even  
405 if current distributions are in disequilibrium with climate. The results in Fig. 1 suggest  
406 that if we were to increase the elevation of the high site, we would still expect the  
407 range limits of lowland species to occur firstly in the presence vs. absence of  
408 neighbors. This suggests that our conclusion that competition is important for setting  
409 range limits at low and high elevations remain valid. We now add this point to the  
410 Discussion (lines 269 – 271).

411  
412 The authors use a community perspective to analyze how the upper and lower  
413 boundaries of species are affected by competition, but the comparisons are between  
414 the upper boundaries of lowland species and the lower boundaries of highland  
415 species, which are all adjacent to other species, not at the harsh boundary of the  
416 target gradient, and not comparing the upper and lower boundaries of specific  
417 species. As the stress gradient hypothesis can be largely from a species  
418 perspective, discussing the relative pressure at their upper and lower boundaries, it  
419 is suggested that the authors clarify the differences.

420  
421 The reviewer is right that our study sites were located beyond the upper boundary of  
422 lowland species (the high site) or beyond the lower boundary of highland species  
423 (the low site). To avoid any confusion about this aspect of the design, we now  
424 explicitly refer to the upper boundary of lowland species and the lower boundary of  
425 highland species throughout the manuscript (lines 91-95). We suggest that future  
426 studies look at whether competition set limits across the whole range (lines 317-  
427 320).

#### 428 429 References

430 Ellner, S. P., D. Z. Childs and M. Rees (2016). Data-Driven Modelling of Structured  
431 Populations : A Practical Guide to the Integral Projection Model, Cham : Springer.

432 Levine, J. M., J. Bascompte, P. B. Adler and S. Allesina (2017). "Beyond pairwise  
433 mechanisms of species coexistence in complex communities." Nature **546**: 56.

434 Usinowicz, J., C.-H. Chang-Yang, Y.-Y. Chen, J. S. Clark, C. Fletcher, N. C. Garwood, Z.  
435 Hao, J. Johnstone, Y. Lin, M. R. Metz, T. Masaki, T. Nakashizuka, I. F. Sun, R. Valencia, Y.  
436 Wang, J. K. Zimmerman, A. R. Ives and S. J. Wright (2017). "Temporal coexistence  
437 mechanisms contribute to the latitudinal gradient in forest diversity." Nature **550**(7674): 105-  
438 108.

439

## REVIEWERS' COMMENTS:

### Reviewer #2 (Remarks to the Author):

I found that the edits to this manuscript dramatically improve the clarity, and I commend the authors on their work. I have two very small comments:

Line 359: which “other plots” are the authors referring to?

Line 468: In the discussion the authors claim that competition is important in setting range limits at both high and low edges, with no pattern consistent with the stress-gradient hypothesis, but then in the methods (line 468), they say that facilitative interactions were discarded—making it difficult to understand whether there is any support at all for the stress gradient hypothesis. In lines 475-476, perhaps they are referring to an analysis that included facilitative interactions, in which case this would be less concerning.

### Reviewer #3 (Remarks to the Author):

I am very glad that the authors have done so much analysis to address my questions. I think this paper is very good and one of the few clear experimental papers to test the species coexistence theory. I have no more questions and think this paper deserves to be published in Nature Communications!

### Reviewer #4 (Remarks to the Author):

After reading the manuscript carefully, I think the authors have addressed my concerns. They better explained how niche and fitness differences may change across an elevation gradient and contexture by using coexistence theory to test the processes shaping species' range edges. They also explicitly discussed limitations, including climate fluctuation and above-below ground interaction, which leads to necessary future research. They have improved the statistics and treated the evidence appropriately to generate their discussion and conclusion. I am satisfied with the current revision.



1 **Author responses**

2 Reviewer #2 (Remarks to the Author):

3

4 I found that the edits to this manuscript dramatically improve the clarity, and I commend the  
5 authors on their work. I have two very small comments:

6

7 Thank you very much for your comments!

8

9 Line 359: which “other plots” are the authors referring to?

10

11 Thanks for pointing this out. “other plots” refers to the plots that failed to establish in autumn  
12 2017. We have added “the other plots that failed to establish” for clarity (lines 356-357).

13

14 Line 468: In the discussion the authors claim that competition is important in setting range  
15 limits at both high and low edges, with no pattern consistent with the stress-gradient  
16 hypothesis, but then in the methods (line 468), they say that facilitative interactions were  
17 discarded—making it difficult to understand whether there is any support at all for the stress  
18 gradient hypothesis. In lines 475-476, perhaps they are referring to an analysis that included  
19 facilitative interactions, in which case this would be less concerning.

20

21 Thank you for pointing this out. We only excluded facilitative interactions to calculate niche  
22 and fitness differences because this analysis is not possible with positive interactions.

23 Therefore, our main result related to competition across the gradient (Fig. 1) and the  
24 analysis you referred to in lines 475-476 (now removed) did include the facilitative  
25 interactions. We have added “we did not exclude facilitative interactions for other analyses”  
26 to the corresponding section in Methods for clarity (lines 470-471).

27

28 Reviewer #3 (Remarks to the Author):

29

30 I am very glad that the authors have done so much analysis to address my questions. I think  
31 this paper is very good and one of the few clear experimental papers to test the species  
32 coexistence theory. I have no more questions and think this paper deserves to be published  
33 in Nature Communications!

34

35 Thank you very much for your comments!

36

37 Reviewer #4 (Remarks to the Author):

38

39 After reading the manuscript carefully, I think the authors have addressed my concerns.  
40 They better explained how niche and fitness differences may change across an elevation  
41 gradient and contexture by using coexistence theory to test the processes shaping species'  
42 range edges. They also explicitly discussed limitations, including climate fluctuation and  
43 above-below ground interaction, which leads to necessary future research. They have  
44 improved the statistics and treated the evidence appropriately to generate their discussion  
45 and conclusion. I am satisfied with the current revision.

46

47 Thank you very much for your comments!

48
